# Supplementary material for: A simple label-free rhodamine 6G SERS probe for quantitative analysis of trace As3+in an aptamer–nanosol
Source: Royal Society of Chemistry journal article supplement (doi:10.1039/c4ra04416a), 2014-07-23
Supplement: c4ra04416a1.pdf [file c4ra04416a1.pdf]

## A simple label-free rhodamine 6G SERS probe for quantitative analysis of trace As(III) in the aptamer-nanosol

Lingling Ye<sup>§</sup>, Guiqing Wen<sup>§</sup>, Jichao Dong, Yanghe Luo, Qingye Liu, Aihui Liang<sup>\*</sup>, Zhiliang Jiang<sup>\*</sup>

Key Laboratory of Ecology of Rare and Endangered Species and Environmental Conservation of  
Education Ministry, Guangxi Key Laboratory of Environmental Pollution Control Theory and  
Technology, Guangxi Normal University, Guilin 541004, China.

### *Preparation of gold nanoparticles*

Nanogold was synthesized through reduction of H<sub>2</sub>AuCl<sub>4</sub> by trisodium citrate. Into a 50 mL boiling water with stirring, a 0.5 mL 1% H<sub>2</sub>AuCl<sub>4</sub> and 3.5mL 1% trisodium citrate were added rapidly successively. After boiling for 10 min, the color became from colorless to wine red. The mixture was continued stirring to room temperature, and then diluted to 50 mL to obtain a concentration of 58.0 µg/mL Au nanogold in size of about 10 nm [25].

### *Preparation of silver nanoparticles*

Silver nanoparticle was synthesized through NaBH<sub>4</sub> reduction process [37]. A 40 mL water was added into a flask, a 3.5mL 10g/L trisodium citrate and 385 µL 2.4×10<sup>-2</sup> mol/L AgNO<sub>3</sub> were added into successively. Then, 4.0mL 0.5mg/mL NaBH<sub>4</sub> was dripped slowly. After 20 min, it was diluted to 50 mL to obtain a 19.9µg/mL Ag nanosilver sol that stored at 4 °C.

### *Preparation of NGssDNA probe*

Piped 10 mL 58.0 µg/mL NGs into a conical flask, added 2.0 mL 2.0mL 0.5µmol/L ssDNA solution under the stirring slowly, continued to stir 15 min, and stored at 4 °C. In terms of ssDNA, the NGssDNA concentration is 83.3 nmol/L.

### *Preparation of NSssDNA probe*

A 3.0mL 19.9µg/mL NSs was moved into a conical flask, and a 1.0mL 0.5 µmol/L ssDNA solution was added slowly to obtain the probe. In terms of ssDNA, this NSssDNA concentration is 125 nmol/L.

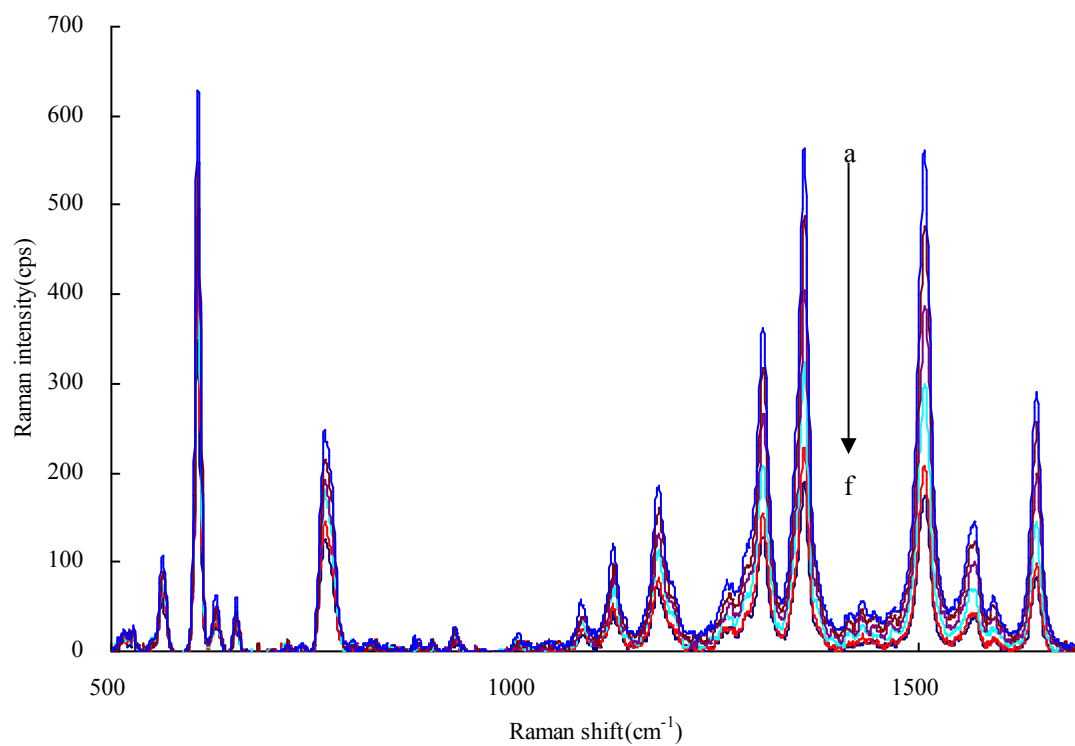

**Fig. 1S SERS spectrum of AgssDNA-As<sup>3+</sup>-Rh6G system**

a: 25nmol/L NSssDNA+pH 8.0 HEPES+50mmol/L NaCl+5.23×10<sup>-6</sup>mol/L Rh6G; b: a+0.144 ng/mL As<sup>3+</sup>; c: a+5.76ng/mL As<sup>3+</sup>; d: a+8.64ng/mL As<sup>3+</sup>; e: a+11.52ng/mL As<sup>3+</sup>; f: a+17.28ng/mL As<sup>3+</sup>.

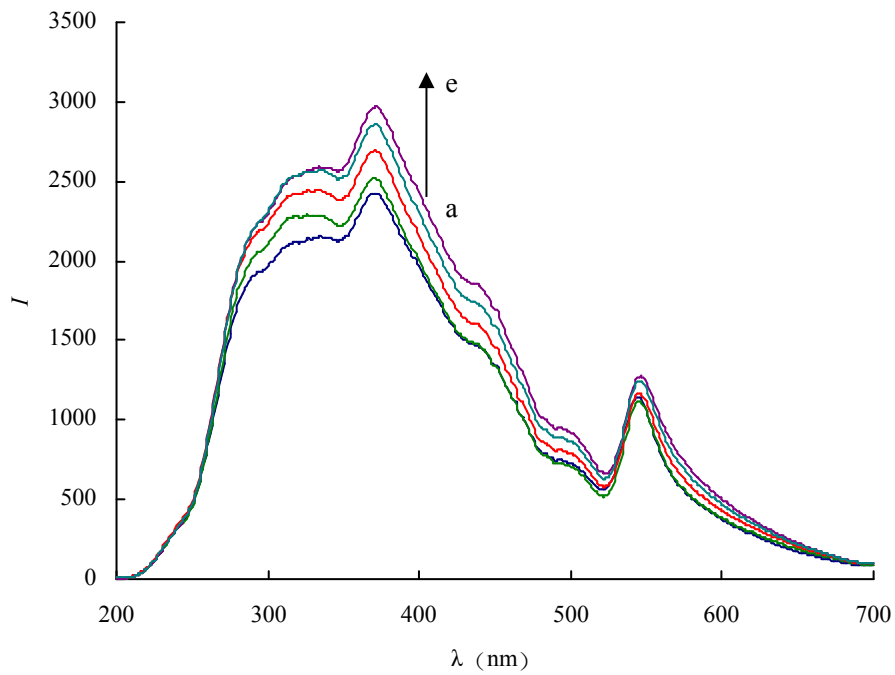

**Fig. 2S RRS spectra of the NGssDNA-  $As^{3+}$ -Rh6G system**

a: 25nmol/L NGssDNA +pH 8.0 HEPES+50mmol/L NaCl+ $5.23 \times 10^{-6}$ mol/L Rh6G; b: a+2.88ng/mL  $As^{3+}$ ; c: a+5.76ng/mL  $As^{3+}$ ; d: a+11.52ng/mL  $As^{3+}$ ; e: a+17.28ng/mL  $As^{3+}$ .

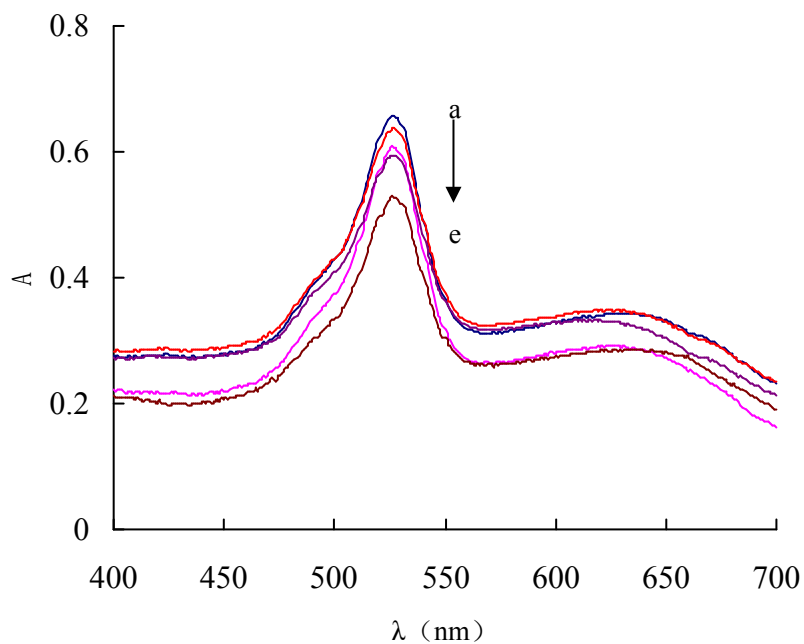

**Fig. 3S UV spectrum of NGssDNA- $As^{3+}$ -Rh6G system**

a: 25nmol/L NGssDNA +15min+ pH 8.0 0.75mmol/L HEPES+50mmol/L NaCl+ $5.23 \times 10^{-6}$ mol/L Rh6G; b: a+2.88ng/mL  $As^{3+}$ ; c: a+5.76ng/mL  $As^{3+}$ ; d: a+11.52ng/mL  $As^{3+}$ ; e: a+17.28ng/mL  $As^{3+}$

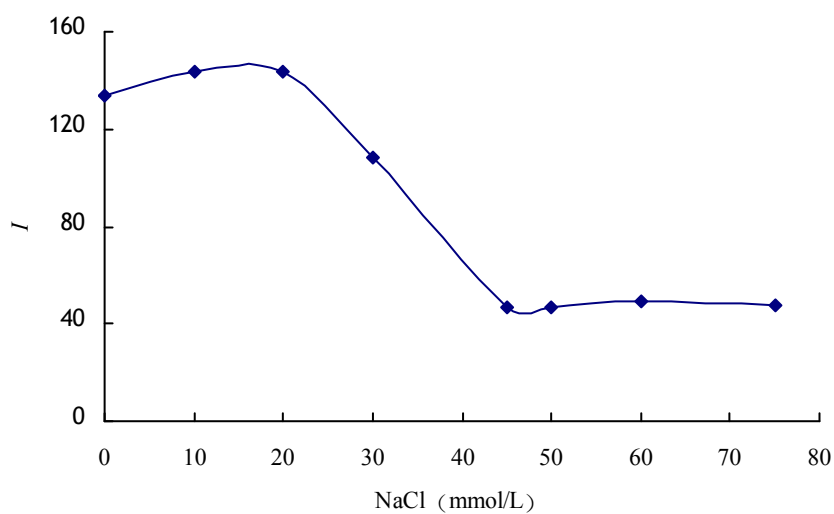

**Fig. 4S Effect of NaCl**

14.3 $\mu$ g/mL NGs+pH 8.0 HEPES + 5.23 $\times 10^{-6}$ mol/L Rh6G

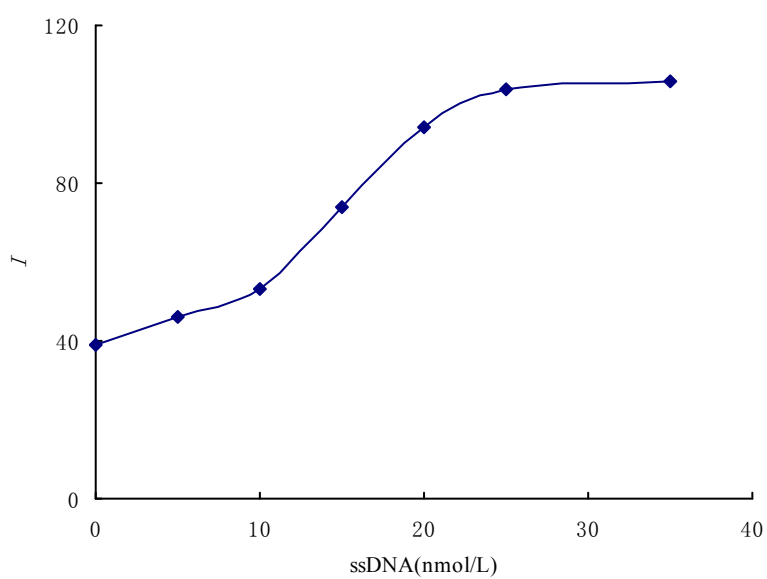

**Fig. 5S Effect of ssDNA concentration**

14.3 $\mu$ g/mL NGs+50mmol/L NaCl+pH 8.0 HEPES + 5.23 $\times 10^{-6}$ mol/L Rh6G

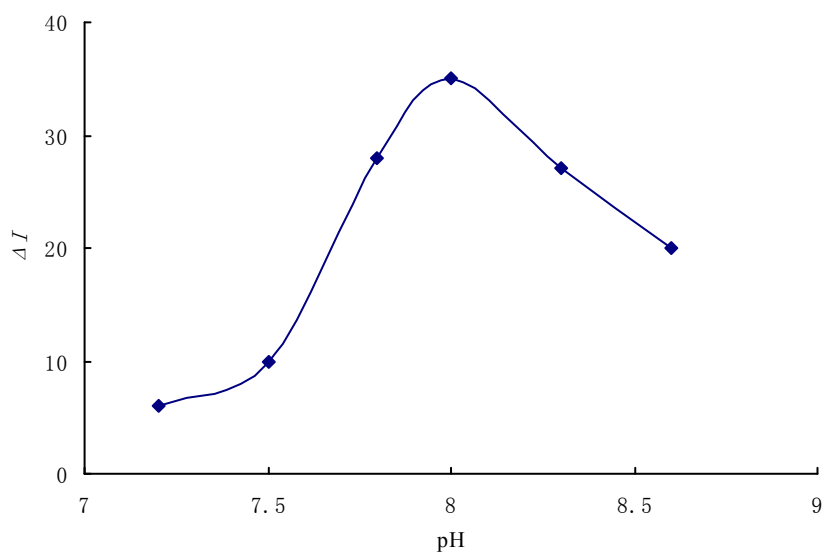

**Fig. 6S Effect of pH**

25nmol/L NGssDNA+50mmol/L NaCl+ 0.75mmol/L HEPES +10 ng/mL  $As^{3+}$ + $5.23 \times 10^{-6}$ mol/L Rh6G

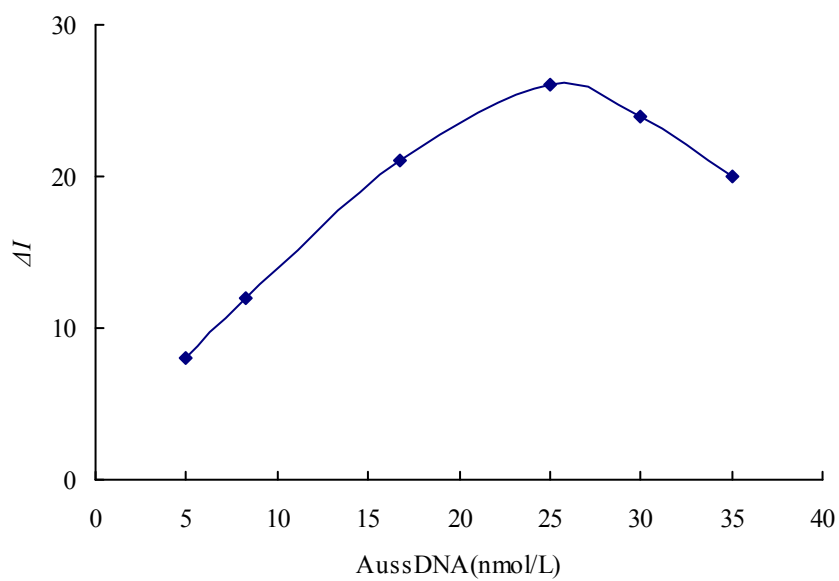

**Fig. 7S Effect of NGssDNA concentration**

50mmol/L NaCl+pH 8.0 HEPES+10 ng/mL  $As^{3+}$  + $5.23 \times 10^{-6}$ mol/L Rh6G

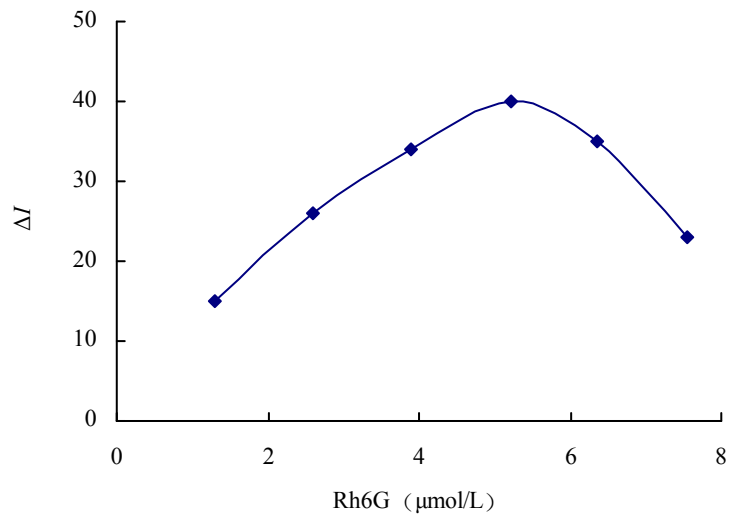

**Fig. 8S Effect of Rh6G concentration**

pH 8.0 HEPES +50mmol/L NaCl+25nmol/L NGssDNA+10 ng/mL As<sup>3+</sup>.

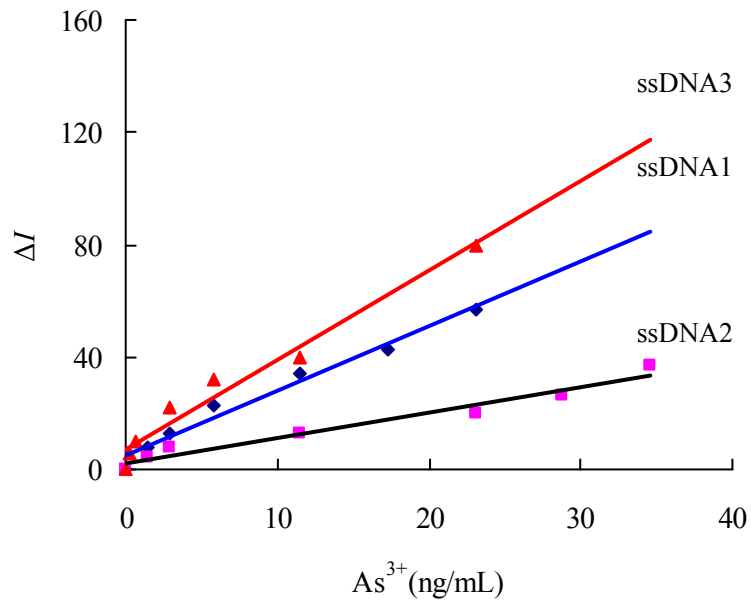

**Fig. 9S Working curve of different ssDNA system**

25nmol/l NGssDNA +50mmol/L NaCl+pH 8.0 HEPES +5.23μmol/L Rh6G

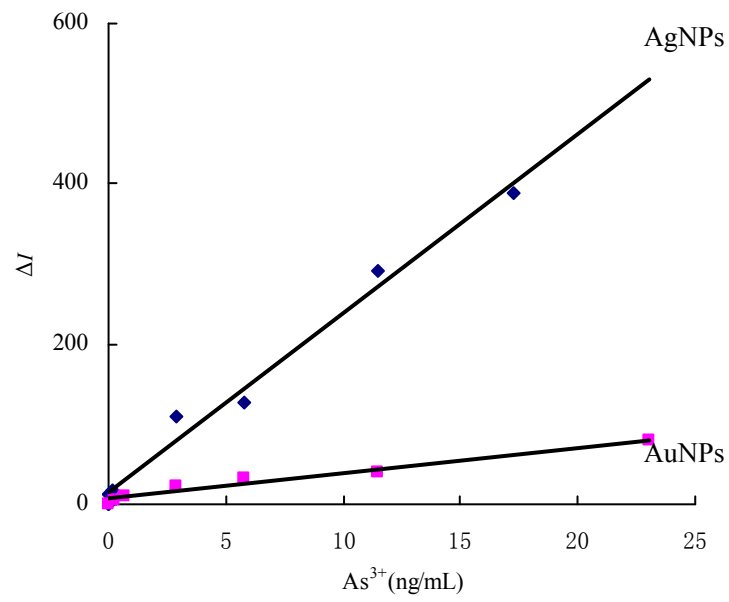

**Fig. 10S Working curve of different SERS substrate system**  
 25nmol/L Au/AgssDNA +50mmol/L NaCl+pH 8.0 HEPES +5.23μmol/L Rh6G.

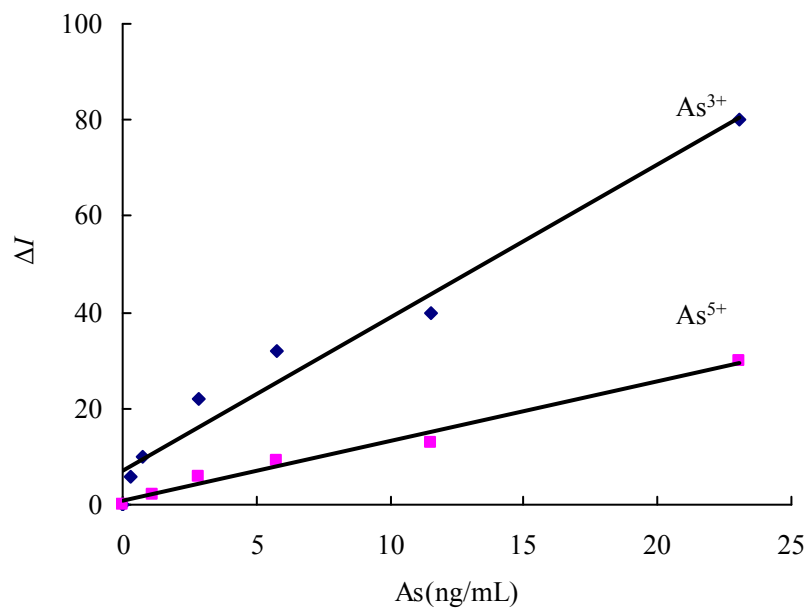

**Fig. 11S Working curve of different valence state arsenic system**  
 25nmol/l NGssDNA +50mmol/LNaCl+pH 8.0 HEPES +5.23μmol/L Rh6G.

**Table 1S Effect of foreign substances**

| Coexistent substance | Tolerance Concentration | Relative error (%) | Coexistent substance | Tolerance Concentration | Relative error (%) |
|----------------------|-------------------------|--------------------|----------------------|-------------------------|--------------------|
| L-valine             | 2.5µg/mL                | -5.7               | Zn <sup>2+</sup>     | 100µmol/L               | 3.6                |
| L-aspartate          | 2.5µg/mL                | 3.7                | K <sup>+</sup>       | 50µmol/L                | 3.7                |
| L-lysine             | 2.5µg/mL                | 1.9                | Co <sup>2+</sup>     | 10µmol/L                | -8.5               |
| glucose              | 15µmol/L                | 3.6                | Hg <sup>2+</sup>     | 10µmol/L                | -1.6               |
| BSA                  | 120ng/mL                | -4.1               | Cu <sup>2+</sup>     | 75µmol/L                | -5.6               |
| HSA                  | 150ng/mL                | 1.8                | Al <sup>3+</sup>     | 7.5µmol/L               | 1.8                |
| Ca <sup>2+</sup>     | 150µmol/L               | -3.5               | Ba <sup>2+</sup>     | 100µmol/L               | 4.2                |
| Mg <sup>2+</sup>     | 150µmol/L               | 3.6                | Fe <sup>3+</sup>     | 2.5µmol/L               | -1.9               |

**Table 2S Different ssDNA system analysis feature**

| System | Regression equation     | Linear range (ng/mL) | Correlation coefficient | Detection limit (ng/mL) |
|--------|-------------------------|----------------------|-------------------------|-------------------------|
| ssDNA1 | $\Delta I = 2.3C + 5.1$ | 1.44-23.04           | 0.9760                  | 0.03                    |
| ssDNA2 | $\Delta I = 0.9C + 2.2$ | 1.44-34.56           | 0.9589                  | 0.07                    |
| ssDNA3 | $\Delta I = 3.2C + 7.0$ | 0.288-23.04          | 0.9676                  | 0.1                     |

**Table 3S Sample analysis results**

| Sample        | Spiked As (ng/mL or ng/g) | Average (ng/mL or ng/g, n=5) | RSD (%) | Recovery (%) | HG-AAS (ng/mL or ng/g) |
|---------------|---------------------------|------------------------------|---------|--------------|------------------------|
| Li river      | -                         | No detected                  | -       | -            | -                      |
|               | 12.5                      | 11.9±0.64                    | 5.4     | 95.2         |                        |
|               | 16.7                      | 16.1±0.68                    | 4.2     | 96.3         |                        |
| Rong lake     | -                         | No detected                  | -       | -            | -                      |
|               | 2.50                      | 2.40±0.16                    | 6.8     | 96.2         |                        |
|               | 5.00                      | 4.89±0.29                    | 5.9     | 97.9         |                        |
| Waste water 1 | -                         | 7.90±0.51                    | 6.4     | -            | 7.42                   |
| Waste water 2 | -                         | 11.5±0.59                    | 5.1     | -            | 10.9                   |
| Milk 1        | -                         | 31.2±1.7                     | 5.4     | -            | 29.8                   |
| Milk 2        | -                         | 28.0±1.2                     | 4.3     | -            | 27.6                   |
